# Supplementary material for: Disentangling group specific QTL allele effects from genetic background epistasis using admixed individuals in GWAS: An application to maize flowering
Source: PubMed Central journal article supplement (PMC7075643; doi:10.1371/journal.pgen.1008241), 2020-03-04
Supplement: pgen.1008241.s019.pdf [file pgen.1008241.s019.pdf]

## S1 Appendix - Interpretation of the test $\Delta_{DD-DA}^m$

Let us re-parametrize model  $\mathbf{M}_3$  so that

$$\beta_{ijk}^m = \alpha_i + \gamma_j + \delta_k + (\alpha\gamma)_{ij} + (\alpha\delta)_{ik} + (\gamma\delta)_{jk} + (\alpha\gamma\delta)_{ijk}$$

where:

- $\alpha_i$  : effect of genotypic allele  $i$  with  $i \in \{0, 1\}$
- $\gamma_j$  : effect of allele ancestry  $j$  with  $j \in \{D, F\}$
- $\delta_k$  : effect of genetic background  $k$  with  $k \in \{D, A, F\}$
- $(\alpha\gamma)_{ij}$  : effect of the "genotypic allele - allele ancestry" interaction
- $(\alpha\delta)_{ik}$  : effect of the "genotypic allele - genetic background" interaction
- $(\gamma\delta)_{jk}$  : effect of the "allele ancestry - genetic background" interaction
- $(\alpha\gamma\delta)_{ijk}$  : effect of the "genotypic allele - allele ancestry - genetic background" interaction

Let us write the test  $\Delta_{DD-DA}^m$  according to the new parametrization:

$$\begin{aligned} \Delta_{DD-DA}^m &= (\beta_{1DD}^m - \beta_{0DD}^m) - (\beta_{1DA}^m - \beta_{0DA}^m) \\ \Delta_{DD-DA}^m &= (\alpha_1 + \gamma_D + \delta_D + (\alpha\gamma)_{1D} + (\alpha\delta)_{1D} + (\gamma\delta)_{DD} + (\alpha\gamma\delta)_{1DD}) \\ &\quad - (\alpha_0 + \gamma_D + \delta_D + (\alpha\gamma)_{0D} + (\alpha\delta)_{0D} + (\gamma\delta)_{DD} + (\alpha\gamma\delta)_{0DD}) \\ &\quad - (\alpha_1 + \gamma_D + \delta_A + (\alpha\gamma)_{1D} + (\alpha\delta)_{1A} + (\gamma\delta)_{DA} + (\alpha\gamma\delta)_{1DD}) \\ &\quad - (\alpha_0 + \gamma_D + \delta_A + (\alpha\gamma)_{0D} + (\alpha\delta)_{0A} + (\gamma\delta)_{DA} + (\alpha\gamma\delta)_{0DA}) \\ \Delta_{DD-DA}^m &= ((\alpha\delta)_{1D} - (\alpha\delta)_{0D}) - ((\alpha\delta)_{1A} - (\alpha\delta)_{0A}) \\ &\quad + ((\alpha\gamma\delta)_{1DD} - (\alpha\gamma\delta)_{0DD}) - ((\alpha\gamma\delta)_{1DA} - (\alpha\gamma\delta)_{0DA}) \end{aligned}$$

In this last expression, all terms involve an interaction between the genotypic allele and the genotypic background.
